# Supplementary material
Source: PubMed Central journal article supplement (PMC6738859)
Supplement: jin-0009-0419-s02.pdf [file jin-0009-0419-s02.pdf]

# Inducible GBP5 Mediates Antiviral Response via Interferon-related Pathway during Influenza A Virus Infection

Jian Feng, Zhongying Cao, Li Wang, Yushun Wan, Nanfang Peng, Qing Wang, Xueyuan Chen, Yaqin Zhou, Ying Zhu

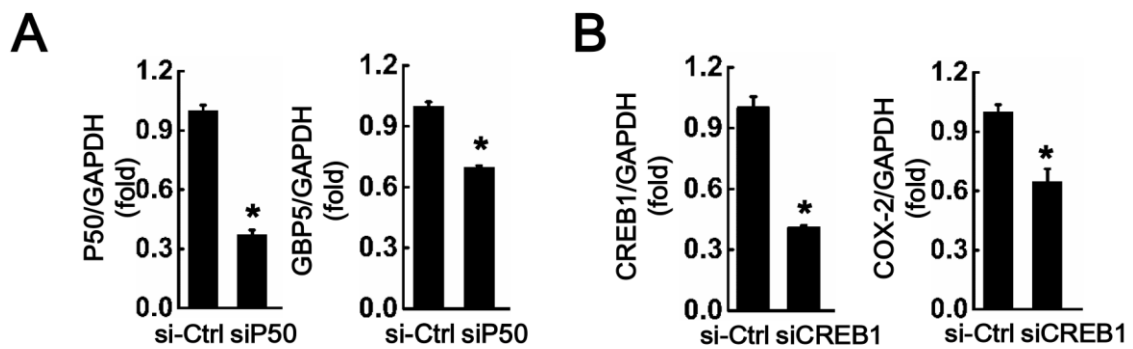

Supplementary Figure 1. (A) A549 cells were transfected with P50 siRNA or control siRNA for 24 h, followed by IAV (MOI=1) infection for 12 h. Cells were then harvested for the measurement of p50 and GBP5 mRNA expression by qRT-PCR. \* $p < 0.05$ . Construction of p50 shRNA or control shRNA were described previously (1).

(B) A549 cells were transfected with specific siRNA for CREB1 or irrelevant control siRNA for 24 h, followed by IAV (MOI=1) infection for 12 h. Cells were then harvested for the measurement of CREB1 and COX-2 mRNA expression by qRT-PCR. \* $p < 0.05$ . The siRNA for CREB1 was described previously (2).

1. **Fang J, Hao Q, Liu L, Li Y, Wu J, Huo X, Zhu Y.** 2012. Epigenetic changes mediated by microRNA miR29 activate cyclooxygenase 2 and lambda-1 interferon production during viral infection. *Journal of virology* **86**:1010-1020.
2. **Garg R, Caino MC, Kazanietz MG.** 2013. Regulation of Transcriptional Networks by PKC Isozymes: Identification of c-Rel as a Key Transcription Factor for PKC-Regulated Genes. *PLoS one* **8**:e67319.
